# Supplementary material for: Partial Deletion of Perk Improved High-Fat Diet-Induced Glucose Intolerance in Mice
Source: PubMed Central journal article supplement — Endocrinol Metab (Seoul). 2023 Nov 13;38(6):782–7. doi: 10.3803/EnM.2023.1738 (PMC10764992; doi:10.3803/enm.2023.1738), 2023-11-13
Supplement: enm-2023-1738-Supplemental-Table-S1.pdf [file enm-2023-1738-Supplemental-Table-S1.pdf]

**Supplemental Table S1.** Primer Sequences for Genotyping Polymerase Chain Reaction

|              | Sequence                                                                                          |
|--------------|---------------------------------------------------------------------------------------------------|
| <i>Perk</i>  | CGG AGA CAG TAC AAG CGC AGA TGA: annealing in an intronic sequence located in the 3' homology arm |
| <i>mPerk</i> | AAG GAC CCT ATC CTC CTG CTG CAC: annealing in the deleted region                                  |
| <i>PGK</i>   | GCT ACC GGT GGA TGT GGA ATG TG: annealing at the inserted PGK-Neo cassette                        |

*Perk*, pancreatic endoplasmic reticulum kinase; *PGK*, phosphoglycerate kinase.
