# Supplementary material for: Partial Deletion of Perk Improved High-Fat Diet-Induced Glucose Intolerance in Mice
Source: PubMed Central journal article supplement — Endocrinol Metab (Seoul). 2023 Nov 13;38(6):782–7. doi: 10.3803/EnM.2023.1738 (PMC10764992; doi:10.3803/enm.2023.1738), 2023-11-13
Supplement: enm-2023-1738-Supplemental-Table-S2.pdf [file enm-2023-1738-Supplemental-Table-S2.pdf]

**Supplemental Table S2.** Primer Sequences for Reverse Transcription-Polymerase Chain Reaction

|                     | Forward                         | Reverse                     |
|---------------------|---------------------------------|-----------------------------|
| <i>Gapdh</i>        | AGT GGA GAT TGT TGC CAT CAA     | TGG ATG CAG GGA TGA TGT TCT |
| <i>Perk/Eif2ak3</i> | GGT TGG GGA CTT TGG ACT GGT GAC | CAG GCA GTG GGC TGT ACG AGC |

*Gapdh*, glyceraldehyde-3-phosphate dehydrogenase; *Perk*, pancreatic endoplasmic reticulum kinase; *Eif2ak3*, eukaryotic translation initiation factor 2 alpha kinase 3.
