# Supplementary material for: Partial Deletion of Perk Improved High-Fat Diet-Induced Glucose Intolerance in Mice
Source: PubMed Central journal article supplement — Endocrinol Metab (Seoul). 2023 Nov 13;38(6):782–7. doi: 10.3803/EnM.2023.1738 (PMC10764992; doi:10.3803/enm.2023.1738), 2023-11-13
Supplement: enm-2023-1738-Supplemental-Table-S3.pdf [file enm-2023-1738-Supplemental-Table-S3.pdf]

**Supplemental Table S3.** Antibodies for Immunohistochemical Staining and Western Blotting

| Antigen and the catalog number     | Company        |
|------------------------------------|----------------|
| ACTIN #2631S                       | Cell signaling |
| ATF4 (MA5-32364)                   | Invitrogen     |
| Cleaved caspase3 #9661             | Cell signaling |
| CHOP #MA1-250                      | Invitrogen     |
| Phospho-EIF2A (Ser51) #9721        | Cell signaling |
| Insulin (C27C9) #3014              | Cell signaling |
| PERK (C33E10) rabbit mAb #3192     | Cell signaling |
| Phospho-PERK (Thr980) (16F8) #3179 | Cell signaling |
| $\gamma$ -Tubulin T6557            | Sigma Aldrich  |

ATF4, activating transcription factor 4; CHOP, C/EBP homologous protein; EIF2A, eukaryotic translation initiation factor 2A; PERK, pancreatic endoplasmic reticulum kinase; mAb, monoclonal antibody.
